# Supplementary material for: Bosea rubneri sp. nov. Isolated from Organically Grown Allium cepa
Source: PubMed Central journal article supplement (PMC11153308; doi:10.1007/s00284-024-03717-6), 2024-06-05
Supplement: 284_2024_3717_MOESM1_ESM.pdf [file 284_2024_3717_MOESM1_ESM.pdf]

16S

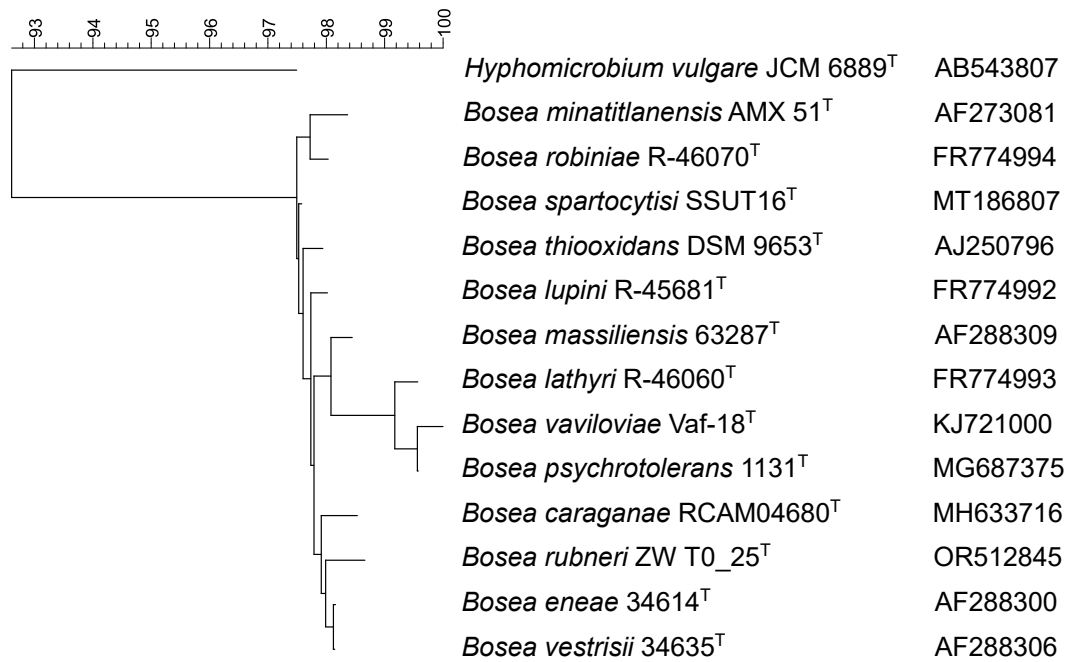

**Fig. S1.** Analysis of 16S rRNA gene sequences of strain ZW T0\_25<sup>T</sup> and all 12 type strains of *Bosea*. *Hyphomicrobium vulgare* JCM 6889<sup>T</sup> was used as an outgroup. Clustering was performed using fast algorithm and neighbour joining (BioNumerics, version 8.1; Applied Maths).

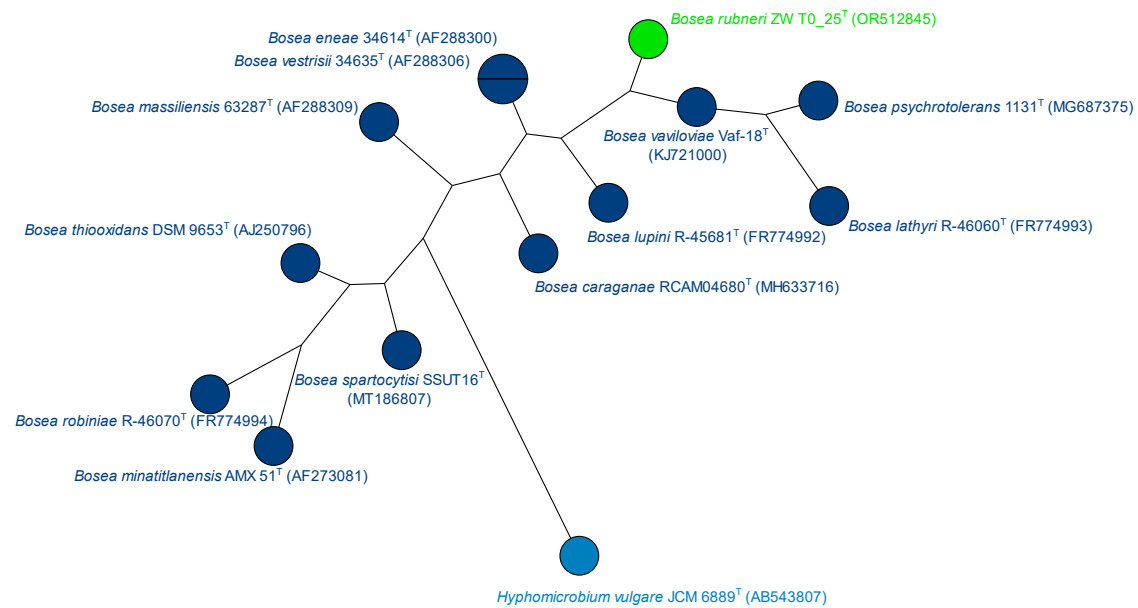

**Fig. S2.** Analysis of 16S rRNA gene sequences (length ca. 1500 bp) of strain ZW T0\_25<sup>T</sup> and all 12 type strains of *Bosea*. *Hyphomicrobium vulgare* JCM 6889<sup>T</sup> was used as an outgroup. The tree was built using maximum parsimony (BioNumerics, version 8.1; Applied Maths). Square root scaling was used to display branch length.

**Table S1. Pairwise nucleotide similarities of the 16S rRNA gene sequences of ZW T0\_25<sup>T</sup> versus type strains of the genus *Bosea*\*.**

Strain: 1, *B. rubneri* sp. nov. ZW T0\_25<sup>T</sup> (OR512845); 2, *B. caraganae* RCAM04680<sup>T</sup> (MH633716); 3, *B. eneeae* 34614<sup>T</sup> (AF288300); 4, *B. lathyri* R-46060<sup>T</sup> (FR774993); 5, *B. lupini* R-45681<sup>T</sup> (FR774992); 6, *B. massiliensis* 63287<sup>T</sup> (AF288309); 7, *B. minatitlanensis* AMX51<sup>T</sup> (AF273081); 8, *B. psychrotolerans* 1131<sup>T</sup> (MG687375); 9, *B. robiniae* R-46070<sup>T</sup> (FR774994); 10, *B. spartocytisi* SSUT16<sup>T</sup> (MT186807); 11, *B. thiooxidans* DSM 9653<sup>T</sup> (AJ250796); 12, *B. vaviloviae* Vaf-18<sup>T</sup> (KJ721000); 13, *B. vestrisii* 34635<sup>T</sup> (AF288306)

| Pairwise Nucleotide Similarity [%]* | 1   | 2     | 3     | 4     | 5     | 6     | 7     | 8     | 9     | 10    | 11    | 12    | 13    |
|-------------------------------------|-----|-------|-------|-------|-------|-------|-------|-------|-------|-------|-------|-------|-------|
| 1                                   | 100 | 98.68 | 99.15 | 98.77 | 99.05 | 98.49 | 97.45 | 99.34 | 98.02 | 98.75 | 98.58 | 99.62 | 99.15 |
| 2                                   | -   | 100   | 99.07 | 98.93 | 98.86 | 98.85 | 98.07 | 98.74 | 98.21 | 98.76 | 98.43 | 98.64 | 99.07 |
| 3                                   | -   | -     | 100   | 98.25 | 99.58 | 98.88 | 97.99 | 98.39 | 98.81 | 99.20 | 99.03 | 98.43 | 99.93 |
| 4                                   | -   | -     | -     | 100   | 98.12 | 98.23 | 97.57 | 99.12 | 97.71 | 97.96 | 97.78 | 98.86 | 98.18 |
| 5                                   | -   | -     | -     | -     | 100   | 99.01 | 98.54 | 98.32 | 99.03 | 99.56 | 99.45 | 98.36 | 99.58 |
| 6                                   | -   | -     | -     | -     | -     | 100   | 98.32 | 98.32 | 98.44 | 98.90 | 98.67 | 98.35 | 98.88 |
| 7                                   | -   | -     | -     | -     | -     | -     | 100   | 97.51 | 99.03 | 98.98 | 98.84 | 97.43 | 98.07 |
| 8                                   | -   | -     | -     | -     | -     | -     | -     | 100   | 97.80 | 98.18 | 97.95 | 99.56 | 98.39 |
| 9                                   | -   | -     | -     | -     | -     | -     | -     | -     | 100   | 99.42 | 98.96 | 97.72 | 98.81 |
| 10                                  | -   | -     | -     | -     | -     | -     | -     | -     | -     | 100   | 99.49 | 98.47 | 99.27 |
| 11                                  | -   | -     | -     | -     | -     | -     | -     | -     | -     | -     | 100   | 97.93 | 99.03 |
| 12                                  | -   | -     | -     | -     | -     | -     | -     | -     | -     | -     | -     | 100   | 98.43 |
| 13                                  | -   | -     | -     | -     | -     | -     | -     | -     | -     | -     | -     | -     | 100   |

Values were obtained using EZBioCloud [27].

\*Pairwise nucleotide similarities above the threshold value of 98.7% [39] are coloured in grey.

**Table S2. Phenotypes predicted by TraitAr (<https://galaxy.bifo.helmholtz-hzi.de/>) for strain ZW T0\_25<sup>T</sup> and of other nine type strains of the genus *Bosea*, for which genome sequences were available. 0, no predictor positive; 1, one predictor positive and labelled in light blue; 2, two predictors positive and labelled in dark blue.**

| Category               | Phenotype                      | <i>Bosea rubneri</i> sp. nov. ZW T0_25 <sup>T</sup> | <i>B. thiooxidans</i> DSM 9653 <sup>T</sup> | <i>B. robiniae</i> DSM 26672 <sup>T</sup> | <i>B. minatitlanensis</i> LMG 26207 <sup>T</sup> | <i>B. lupini</i> DSM 26673 <sup>T</sup> | <i>B. caraganae</i> RCAM04680 <sup>T</sup> | <i>B. spartocytisi</i> SSUT 16 <sup>T</sup> | <i>B. lathyri</i> DSM 26656 <sup>T</sup> | <i>B. vaviloviae</i> VAF_18 <sup>T</sup> | <i>B. psychrotolerans</i> 1131 <sup>T</sup> |
|------------------------|--------------------------------|-----------------------------------------------------|---------------------------------------------|-------------------------------------------|--------------------------------------------------|-----------------------------------------|--------------------------------------------|---------------------------------------------|------------------------------------------|------------------------------------------|---------------------------------------------|
| enzyme                 | Pyrrolidonyl–naphthylamide     | 0                                                   | 0                                           | 0                                         | 0                                                | 0                                       | 1                                          | 1                                           | 2                                        | 0                                        | 0                                           |
| enzyme                 | Beta-hemolysis                 | 0                                                   | 0                                           | 0                                         | 0                                                | 0                                       | 0                                          | 0                                           | 0                                        | 0                                        | 0                                           |
| enzyme                 | Nitrite to gas                 | 0                                                   | 0                                           | 0                                         | 0                                                | 0                                       | 0                                          | 0                                           | 0                                        | 0                                        | 0                                           |
| enzyme                 | Coagulase production           | 1                                                   | 1                                           | 1                                         | 1                                                | 0                                       | 1                                          | 0                                           | 1                                        | 0                                        | 0                                           |
| enzyme                 | Nitrate-to-nitrite conversion  | 2                                                   | 2                                           | 1                                         | 1                                                | 2                                       | 2                                          | 1                                           | 2                                        | 2                                        | 2                                           |
| enzyme                 | Alkaline phosphatase           | 2                                                   | 2                                           | 2                                         | 2                                                | 2                                       | 2                                          | 2                                           | 2                                        | 2                                        | 2                                           |
| enzyme                 | Lipase                         | 2                                                   | 2                                           | 2                                         | 2                                                | 1                                       | 2                                          | 2                                           | 2                                        | 2                                        | 2                                           |
| growth                 | Growth at 42°C                 | 0                                                   | 0                                           | 0                                         | 1                                                | 0                                       | 0                                          | 0                                           | 0                                        | 0                                        | 1                                           |
| growth                 | DNase                          | 0                                                   | 0                                           | 0                                         | 0                                                | 0                                       | 0                                          | 0                                           | 0                                        | 0                                        | 0                                           |
| growth                 | Growth in 6.5% NaCl            | 0                                                   | 0                                           | 0                                         | 0                                                | 0                                       | 0                                          | 0                                           | 0                                        | 0                                        | 0                                           |
| growth                 | Mucate utilization             | 1                                                   | 1                                           | 1                                         | 1                                                | 1                                       | 1                                          | 1                                           | 1                                        | 1                                        | 1                                           |
| growth                 | Growth on MacConkey agar       | 1                                                   | 2                                           | 1                                         | 2                                                | 1                                       | 2                                          | 2                                           | 1                                        | 1                                        | 1                                           |
| growth                 | Bile susceptible               | 2                                                   | 2                                           | 2                                         | 2                                                | 2                                       | 2                                          | 2                                           | 2                                        | 2                                        | 2                                           |
| growth                 | Growth in KCN                  | 2                                                   | 2                                           | 2                                         | 2                                                | 2                                       | 2                                          | 2                                           | 2                                        | 2                                        | 2                                           |
| growth                 | Colistin-polymyxin susceptible | 2                                                   | 2                                           | 2                                         | 2                                                | 2                                       | 2                                          | 2                                           | 2                                        | 2                                        | 2                                           |
| growth                 | Growth on ordinary blood agar  | 2                                                   | 2                                           | 2                                         | 2                                                | 2                                       | 2                                          | 2                                           | 2                                        | 2                                        | 2                                           |
| growth amino acid      | Indole                         | 0                                                   | 0                                           | 0                                         | 0                                                | 0                                       | 0                                          | 0                                           | 0                                        | 0                                        | 0                                           |
| growth amino acid      | Ornithine decarboxylase        | 0                                                   | 0                                           | 0                                         | 0                                                | 0                                       | 0                                          | 0                                           | 0                                        | 0                                        | 0                                           |
| growth amino acid      | Lysine decarboxylase           | 0                                                   | 0                                           | 0                                         | 0                                                | 0                                       | 0                                          | 0                                           | 0                                        | 0                                        | 0                                           |
| growth amino acid      | Arginine dihydrolase           | 2                                                   | 0                                           | 0                                         | 2                                                | 0                                       | 0                                          | 0                                           | 2                                        | 0                                        | 2                                           |
| growth carboxylic acid | Citrate                        | 0                                                   | 0                                           | 0                                         | 0                                                | 0                                       | 0                                          | 0                                           | 0                                        | 0                                        | 0                                           |
| growth carboxylic acid | Tartrate utilization           | 0                                                   | 0                                           | 0                                         | 1                                                | 1                                       | 1                                          | 1                                           | 1                                        | 1                                        | 1                                           |
| growth carboxylic acid | acetate utilization            | 2                                                   | 1                                           | 1                                         | 0                                                | 2                                       | 1                                          | 1                                           | 2                                        | 0                                        | 2                                           |



|               |                                    |   |   |   |   |   |   |   |   |   |   |
|---------------|------------------------------------|---|---|---|---|---|---|---|---|---|---|
| morphology    | Coccus—pairs or chains predominate | 0 | 0 | 0 | 0 | 0 | 0 | 0 | 0 | 0 | 0 |
| morphology    | Bacillus or coccobacillus          | 2 | 2 | 2 | 2 | 2 | 2 | 2 | 2 | 2 | 2 |
| morphology    | Gram negative                      | 2 | 2 | 2 | 2 | 2 | 2 | 2 | 2 | 2 | 2 |
| morphology    | Motile                             | 2 | 2 | 2 | 2 | 2 | 2 | 2 | 2 | 2 | 2 |
| oxygen        | Anaerobe                           | 0 | 0 | 0 | 0 | 0 | 0 | 0 | 0 | 0 | 0 |
| oxygen        | Facultative                        | 0 | 0 | 0 | 0 | 0 | 0 | 0 | 0 | 0 | 0 |
| oxygen        | Capnophilic                        | 0 | 1 | 1 | 1 | 1 | 1 | 1 | 1 | 0 | 1 |
| oxygen        | aerobe                             | 2 | 2 | 2 | 1 | 2 | 2 | 2 | 2 | 2 | 2 |
| oxygen enzyme | Oxidase                            | 2 | 2 | 2 | 2 | 2 | 2 | 0 | 0 | 0 | 2 |
| oxygen enzyme | Catalase                           | 2 | 2 | 2 | 2 | 2 | 2 | 2 | 2 | 2 | 2 |
| product       | Hydrogen sulfide                   | 0 | 0 | 0 | 0 | 0 | 0 | 0 | 0 | 0 | 0 |
| proteolysis   | Gelatin hydrolysis                 | 0 | 0 | 0 | 0 | 0 | 0 | 0 | 0 | 0 | 0 |
| proteolysis   | Casein hydrolysis                  | 0 | 0 | 0 | 0 | 1 | 2 | 1 | 1 | 2 | 2 |

## DSMZ Identification Services polar lipid report

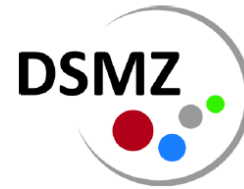

PE = Phosphatidylethanolamine  
PG = Phosphatidylglycerol

APL = Aminophospholipid  
AL = Aminolipid  
GL = Glycolipid  
PL = Phospholipid

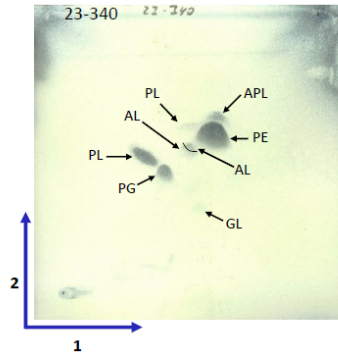

Fig. S3. Polar lipid report as provided by DSMZ Identification Services for strain ZW T0\_25<sup>T</sup>.

**Table S3. Fatty acid composition of *B. rubneri* sp. nov. ZW T0\_25<sup>T</sup>.**

| Fatty acids*                    | Percent |
|---------------------------------|---------|
| C <sub>14:0</sub>               | 0.2     |
| C <sub>14:0</sub> DMA           | 0.1     |
| C <sub>15:0</sub>               | 0.3     |
| C <sub>16:0</sub>               | 7.1     |
| C <sub>16:0</sub> 3OH           | 3.5     |
| C <sub>16:1</sub> w5c           | 2.7     |
| C <sub>16:1</sub> w7c           | 19.5    |
| C <sub>17:0</sub>               | 0.4     |
| C <sub>17:1</sub> w6c           | 0.2     |
| C <sub>17:1</sub> w8c           | 0.6     |
| C <sub>18:0</sub>               | 0.3     |
| C <sub>18:1</sub> w7c           | 63.3    |
| C <sub>18:1</sub> w7c 11-methyl | 1.4     |
| C <sub>18:1</sub> w9c           | 0.5     |

\* Analyses were carried out by the Identification Service of the DSMZ (German Collection of Microorganisms and Cell Cultures, Braunschweig, Germany).
